# Supplementary material for: Bioinformatic Prediction of Signaling Pathways for Apurinic/Apyrimidinic Endodeoxyribonuclease 1 (APEX1) and Its Role in Cholangiocarcinoma Cells
Source: MDPI journal article supplement (doi:10.3390/molecules26092587), 2021-04-29
Supplement: s1 [file s1]

## Supplementary Materials

**Table S1.** The relative expression level of 229 distinct proteins found in the scramble of CCA cell lines

| Protein Name                                                               | Accession number | <sup>a</sup> Scramble<br>KKU-213A | <sup>b</sup> Scramble<br>KKU-100 |
|----------------------------------------------------------------------------|------------------|-----------------------------------|----------------------------------|
| 2-oxoglutarate dehydrogenase, mitochondrial                                | A0A0D9SFS3       | 17.87760                          | 18.38777                         |
| 5-azacytidine induced 1                                                    | B2RN10           | 17.63603                          | 16.14597                         |
| Activating signal cointegrator 1 complex subunit 3                         | Q8N3C0           | 14.59243                          | 15.96103                         |
| AD 2                                                                       | Q9Y6Z1           | 15.15167                          | 14.29617                         |
| ADAM metallopeptidase with thrombospondin type 1 motif, 13, isoform CRA_a  | A0A024R8G4       | 19.39700                          | 19.87283                         |
| Adenomatous polyposis coli protein isoform t                               | A0A224AV41       | 15.61146                          | 16.76630                         |
| Adhesion G protein-coupled receptor B2                                     | A2A3C6           | 17.09320                          | 16.84173                         |
| ALS2                                                                       | A0A2X0SFA0       | 15.71283                          | 15.95290                         |
| Alternative protein ZNF606                                                 | L8ECK5           | 18.01287                          | 17.70510                         |
| Amiloride-sensitive sodium channel subunit alpha 1                         | C5HTY8           | 15.53853                          | 15.90037                         |
| Arf-GAP with Rho-GAP domain, ANK repeat and PH domain-containing protein 3 | G5E9Y3           | 16.08333                          | 16.77900                         |
| ARHGEF12                                                                   | A0A2X0SFF5       | 16.04597                          | 15.10513                         |
| ATPase MORC2                                                               | Q9Y6X9           | 14.79150                          | 17.62440                         |
| ATP-binding cassette sub-family A member 10                                | Q8WWZ4           | 17.59753                          | 16.79400                         |
| ATP-binding cassette sub-family A member 2                                 | A0A087W XK5      | 13.94003                          | 14.19603                         |
| ATP-binding cassette, sub-family C, member 3 isoform MRP3 variant          | Q59H05           | 16.05830                          | 14.61843                         |
| Aurora kinase A-interacting protein                                        | Q9NWT8           | 15.30900                          | 16.01690                         |
| BAG family molecular chaperone regulator 3                                 | C9JFK9           | 15.89267                          | 14.33363                         |
| BAH and coiled-coil domain-containing protein 1                            | F8WBW8           | 15.41506                          | 17.83900                         |
| Beta-klotho                                                                | Q86Z14           | 16.48230                          | 15.33950                         |
| Brain my037 protein                                                        | Q9H3I9           | 13.24126                          | 12.97372                         |
| Brain specific protein, isoform CRA_a                                      | A0A024R702       | 18.11290                          | 18.01560                         |
| Breast carcinoma amplified sequence 2 variant                              | Q53HE3           | 14.73707                          | 15.91413                         |
| C10orf54 protein                                                           | Q2TA85           | 14.29267                          | 15.93750                         |
| C6orf134 protein                                                           | Q8TAV6           | 16.22963                          | 14.86110                         |
| Calcium and integrin-binding protein 1                                     | Q99828           | 17.53020                          | 15.07003                         |
| Calpain-12                                                                 | Q6ZSI9           | 18.27563                          | 19.84010                         |
| CCR4-NOT transcription complex, subunit 4, isoform CRA_b                   | A0A024R781       | 17.79387                          | 17.79763                         |
| CDC42                                                                      | P60953           | 18.18233                          | 16.82080                         |
| Centaurin-alpha 2 protein variant                                          | Q53HQ4           | 15.02563                          | 15.27843                         |
| Centromere protein F                                                       | P49454           | 18.46990                          | 16.87707                         |

**Table S1.** The relative expression level of 229 distinct proteins found in the scramble of CCA cell lines (cont.)

| Protein Name                                                      | Accession number | <sup>a</sup> Scramble<br>KKU-213A | <sup>b</sup> Scramble<br>KKU-100 |
|-------------------------------------------------------------------|------------------|-----------------------------------|----------------------------------|
| Centrosomal protein 350kDa, isoform CRA_a                         | A0A024R914       | 15.37743                          | 16.94347                         |
| Centrosomal protein of 120 kDa                                    | Q8N960           | 18.17633                          | 19.09570                         |
| Centrosomal protein of 135 kDa                                    | Q66GS9           | 16.49937                          | 15.45380                         |
| Chromobox homolog 4 (Pc class homolog, Drosophila), isoform CRA_a | A0A0S2Z5B2       | 13.94140                          | 17.20417                         |
| Chronic lymphocytic leukemia up-regulated protein 1               | Q5K131           | 18.04747                          | 16.93763                         |
| Cilia- and flagella-associated protein 47                         | Q6ZTR5           | 17.62390                          | 16.24830                         |
| ciliary rootlet coiled-coil protein 2                             | H7BZ55           | 16.08763                          | 16.99510                         |
| Cis-aconitate decarboxylase                                       | H7C1Q4           | 15.31716                          | 15.37867                         |
| Coiled-coil domain-containing protein 188                         | H7C350           | 14.41050                          | 13.98323                         |
| Collagen, type IV, alpha 4, isoform CRA_a                         | J3KNM7           | 17.25637                          | 16.62053                         |
| Collagen, type VI, alpha 3                                        | D9ZGF2           | 16.37223                          | 15.43660                         |
| COMM domain-containing protein 7                                  | V9GY66           | 15.81030                          | 14.28113                         |
| CREB3 regulatory factor                                           | Q8IUR6           | 17.62947                          | 17.87150                         |
| cyclin-Y-like protein 3                                           | P0C7X3           | 13.08580                          | 13.41513                         |
| Dedicator of cytokinesis 1                                        | B2RUU3           | 17.06073                          | 17.23113                         |
| Dedicator of cytokinesis 8, isoform CRA_a                         | D3DRH1           | 18.32153                          | 15.47723                         |
| Dedicator of cytokinesis protein 3                                | Q8IZD9           | 16.42507                          | 14.05907                         |
| Delta globin                                                      | A0N071           | 16.63513                          | 15.81870                         |
| Disintegrin and metalloproteinase domain-containing protein 11    | K7EKA8           | 13.82340                          | 15.20453                         |
| Dmx-like 2, isoform CRA_c                                         | A0A024R5V2       | 19.17487                          | 15.25170                         |
| DNA excision repair protein ERCC-6                                | Q03468           | 14.87870                          | 15.02820                         |
| DNA topoisomerase 1                                               | P11387           | 13.65473                          | 15.18317                         |
| DNA-repair protein complementing XP-G cells variant               | Q59FZ7           | 16.87553                          | 16.00773                         |
| E1A-binding protein p400                                          | Q96L91           | 13.67566                          | 16.80097                         |
| E3 ubiquitin-protein ligase RBBP6                                 | A0A2R8Y880       | 17.89767                          | 13.64367                         |
| E3 ubiquitin-protein ligase RNF213                                | A0A0A0MTR7       | 18.60923                          | 19.21367                         |
| E3 ubiquitin-protein ligase TRAF7                                 | Q6Q0C0           | 14.88397                          | 18.38587                         |
| Ectonucleotide pyrophosphatase/phosphodiesterase family member 2  | E7EUF1           | 15.43807                          | 14.42127                         |
| EF-hand calcium-binding domain-containing protein 13              | Q8IY85           | 16.58067                          | 14.71837                         |
| EMILIN-2                                                          | Q9BXX0           | 15.78950                          | 16.04143                         |
| Endothelin-converting enzyme-like 1                               | O95672           | 15.84047                          | 18.22840                         |
| Envoplakin                                                        | Q92817           | 17.29983                          | 18.32663                         |

**Table S1.** The relative expression level of 229 distinct proteins found in the scramble of CCA cell lines (cont.)

| Protein Name                                                                 | Accession number | <sup>a</sup> Scramble<br>KKU-213A | <sup>b</sup> Scramble<br>KKU-100 |
|------------------------------------------------------------------------------|------------------|-----------------------------------|----------------------------------|
| Eukaryotic translation initiation factor 4 gamma, 3 variant                  | Q59GJ0           | 24.22767                          | 22.38883                         |
| Family with sequence similarity 184, member A                                | Q6P9G8           | 15.25993                          | 15.02410                         |
| FBLN7 protein                                                                | Q8IY13           | 17.98420                          | 17.12727                         |
| F-box/WD repeat-containing protein 11                                        | Q9UKB1           | 15.32986                          | 13.77667                         |
| Fc receptor-like protein 2                                                   | Q96LA5           | 22.58750                          | 22.53563                         |
| FEX1                                                                         | Q0PNF2           | 15.73710                          | 16.98583                         |
| FLJ00077 protein                                                             | Q9H7J7           | 16.64933                          | 13.34683                         |
| G protein-coupled receptor 6                                                 | E7EP76           | 15.31173                          | 14.27837                         |
| GCN1 general control of amino-acid synthesis 1-like 1 (Yeast), isoform CRA_b | A0A024RBS1       | 14.81610                          | 12.99043                         |
| General transcription factor II-I repeat domain-containing protein 2B        | A0A494C1N8       | 15.99300                          | 15.64023                         |
| Glycoprotein receptor gp330/megalin                                          | Q7Z5C1           | 16.99430                          | 16.54913                         |
| Golgin subfamily A member 8S                                                 | H3BPF8           | 16.43907                          | 13.92670                         |
| GPI mannosyltransferase 2                                                    | Q9NUD9           | 14.42080                          | 15.28547                         |
| GTP-binding protein 1                                                        | H0YH10           | 18.26700                          | 15.61947                         |
| Guanine nucleotide-binding protein-like 3                                    | Q9BVP2           | 15.71447                          | 19.19287                         |
| HCFC1                                                                        | A0A223PQH6       | 18.57467                          | 16.97147                         |
| HCG1990170, isoform CRA_a                                                    | D6W4X8           | 24.53713                          | 20.85010                         |
| HCG2009921, isoform CRA_c                                                    | Q96MT5           | 14.43366                          | 16.01797                         |
| HCG2036600, isoform CRA_a                                                    | D3DNY4           | 17.74387                          | 18.13080                         |
| HCG2039413, isoform CRA_a                                                    | A0A024RE15       | 16.93923                          | 17.15690                         |
| HCG401289, isoform CRA_e                                                     | A8MT14           | 13.20563                          | 15.64897                         |
| Heat shock 105kDa/110kDa protein 1, isoform CRA_a                            | A0A024RDQ0       | 16.22890                          | 15.96347                         |
| HERC2-like protein 3                                                         | Q9BVR0           | 14.71810                          | 12.78303                         |
| Histone acetyltransferase p300                                               | Q09472           | 15.70146                          | 17.28517                         |
| Histone deacetylase 5                                                        | Q9UQL6           | 15.72247                          | 16.61137                         |
| Histone H1.2                                                                 | P16403           | 14.06360                          | 14.74320                         |
| Histone PARylation factor 1                                                  | Q9NWX4           | 17.84790                          | 16.72517                         |
| Histone-lysine N-methyltransferase KMT5C                                     | A0A0D9SF94       | 14.14720                          | 14.02173                         |
| Histone-lysine N-methyltransferase SETD1B                                    | A0A0A0MQV9       | 16.24203                          | 13.90673                         |
| IG c109_heavy_IGHV1-69_IGHD5-24_IGHJ4                                        | A0A5C2GDC2       | 14.32250                          | 14.08840                         |
| IG c1159_heavy_IGHV4-31_IGHD3-22_IGHJ4                                       | A0A5C2GTJ0       | 13.59333                          | 13.92013                         |
| IG c1235_heavy_IGHV3-74_IGHD2-8_IGHJ6                                        | A0A5C2GPC0       | 13.69417                          | 16.14020                         |

**Table S1.** The relative expression level of 229 distinct proteins found in the scramble of CCA cell lines (cont.)

| Protein Name                                                       | Accession number | <sup>a</sup> Scramble<br>KKU-213A | <sup>b</sup> Scramble<br>KKU-100 |
|--------------------------------------------------------------------|------------------|-----------------------------------|----------------------------------|
| IG c1531_heavy_IGHV3-74_IGHD3-3_IGHJ4                              | A0A5C2GVM4       | 16.59933                          | 18.09440                         |
| IG c780_heavy_IGHV3-11_IGHD4-23_IGHJ4                              | A0A5C2GQG4       | 16.48320                          | 16.31570                         |
| IGH + IGL c482_heavy_IGHV1-69_IGHD4-23_IGHJ3                       | A0A5C2GBQ8       | 16.84727                          | 17.51350                         |
| IGH c505_heavy__IGHV2-5_IGHD6-19_IGHJ4                             | A0A5C2GB92       | 13.49936                          | 15.63530                         |
| Inhibitor of Bruton tyrosine kinase                                | E9PDR5           | 14.20103                          | 15.63863                         |
| Inositol 1,4,5-trisphosphate receptor type 3                       | Q14573           | 17.08020                          | 17.53343                         |
| Insulin-like growth factor 2 mRNA-binding protein 3                | O00425           | 18.44683                          | 17.82880                         |
| Interferon-induced protein with tetratricopeptide repeats 1        | P09914           | 12.31237                          | 12.55710                         |
| Interleukin-34                                                     | J3QQT3           | 14.13210                          | 14.31483                         |
| Intraflagellar transport 81 homolog (Chlamydomonas), isoform CRA_c | A0A024RBJ1       | 17.00607                          | 18.40990                         |
| Kallikrein-8                                                       | A0A0A0MQY9       | 12.50293                          | 12.89183                         |
| Kelch repeat and BTB (POZ) domain containing 4 variant             | Q53HN0           | 15.44260                          | 17.56830                         |
| Keratocan                                                          | O60938           | 15.84103                          | 14.07130                         |
| KIAA0423, isoform CRA_a                                            | G3XAE9           | 16.53570                          | 17.97470                         |
| KIAA0649, isoform CRA_a                                            | A0A024R8E9       | 14.87946                          | 16.80693                         |
| KIF26A variant protein                                             | B0IIR4           | 17.37247                          | 17.87057                         |
| Kinesin-like protein KIF19                                         | Q2TAC6           | 16.63303                          | 18.37177                         |
| La-related protein 6                                               | Q9BRS8           | 14.78993                          | 17.18317                         |
| Large tegument protein                                             | A0A126LAX2       | 17.44143                          | 16.35543                         |
| Leucine rich repeat containing 24                                  | G3V1D8           | 17.60197                          | 15.57600                         |
| Leucine-, glutamate- and lysine-rich protein 1                     | J3KP02           | 13.99303                          | 15.94800                         |
| Leucine-rich PPR-motif containing                                  | E5KNY5           | 18.22730                          | 15.60623                         |
| Lymphocyte antigen 75                                              | O60449           | 17.46047                          | 16.89870                         |
| Lysine-specific demethylase 6B                                     | O15054           | 15.78803                          | 14.22957                         |
| Matrix metalloproteinase 15 (Membrane-inserted), isoform CRA_a     | A0A024R6U8       | 15.80653                          | 14.85597                         |
| Matrix-remodelling associated 8, isoform CRA_a                     | A0A024R0A0       | 13.47153                          | 16.93940                         |
| Metastasis-suppressor KiSS-1                                       | A0A0D9SES6       | 17.80073                          | 16.97213                         |
| Microtubule-associated tumor suppressor candidate 2                | Q5JR59           | 18.45887                          | 16.33460                         |
| Molybdenum cofactor synthesis 1, isoform CRA_c                     | A0A024RD17       | 14.27760                          | 14.20430                         |
| MORC family CW-type zinc finger protein 4                          | Q8TE76           | 15.35043                          | 16.66670                         |
| Mucin 5AC, oligomeric mucus/gel-forming                            | A7Y9J9           | 15.19480                          | 17.36117                         |
| Mucin-16                                                           | Q8WXI7           | 16.23690                          | 16.68887                         |

**Table S1.** The relative expression level of 229 distinct proteins found in the scramble of CCA cell lines (cont.)

| Protein Name                                                                | Accession number | <sup>a</sup> Scramble<br>KKU-213A | <sup>b</sup> Scramble<br>KKU-100 |
|-----------------------------------------------------------------------------|------------------|-----------------------------------|----------------------------------|
| Myosin-10                                                                   | P35580           | 16.25173                          | 16.91530                         |
| Myotubularin-related protein 6                                              | Q9Y217           | 15.29543                          | 14.81380                         |
| N-acetylaspartate synthetase                                                | Q8N9F0           | 13.55867                          | 13.87167                         |
| NAD-dependent protein deacetylase sirtuin-3, mitochondrial                  | E9PM52           | 14.40500                          | 14.95453                         |
| NADH dehydrogenase (Ubiquinone) 1 beta subcomplex, 10, 22kDa, isoform CRA_b | A8K761           | 13.96456                          | 12.50590                         |
| Neurobeachin                                                                | Q5T321           | 15.61820                          | 14.75657                         |
| Neurofilament heavy polypeptide                                             | P12036           | 19.27670                          | 17.23753                         |
| Neurogenic locus notch homolog protein 4                                    | A0A1U9X943       | 15.20473                          | 15.55113                         |
| Neurologin 3 isoform A                                                      | X5DNV3           | 16.57070                          | 18.54673                         |
| NMDA receptor regulated 1-like                                              | A4FU51           | 14.40600                          | 16.02517                         |
| NOELIN3_V2                                                                  | Q6IMJ0           | 16.00263                          | 15.12617                         |
| NRAP protein                                                                | A0AVL2           | 17.68630                          | 17.09530                         |
| Nuclear factor 1                                                            | Q7Z3K7           | 15.87430                          | 15.30123                         |
| Nuclear protein MDM1                                                        | Q8TC05           | 15.67590                          | 15.73000                         |
| Nuclear receptor-interacting protein 3                                      | E9PIW3           | 18.00467                          | 17.19533                         |
| Nucleolar protein 8, isoform CRA_a                                          | A0A024R250       | 14.18330                          | 17.07353                         |
| Olfactory receptor 1A1                                                      | Q9P1Q5           | 18.71137                          | 20.03993                         |
| PDZ domain-containing RING finger protein 4                                 | Q6ZMN7           | 16.82587                          | 14.73747                         |
| Pecanex-like protein 2                                                      | A6NKB5           | 16.40663                          | 16.47937                         |
| Phosphatidylinositol 4-kinase alpha                                         | P42356           | 14.30720                          | 15.06517                         |
| PLA2R1 protein                                                              | B7ZML4           | 16.47977                          | 14.66623                         |
| Pleckstrin homology domain-containing family G member 1                     | A0A2R8Y2B1       | 14.63725                          | 14.47950                         |
| PLEKHG3                                                                     | A0A2X0SFH4       | 18.76337                          | 18.87670                         |
| Postreplication repair protein hRAD18p variant                              | Q53H10           | 18.58957                          | 19.58557                         |
| Pre-mRNA-processing factor 40 homolog A                                     | O75400           | 17.30100                          | 16.85277                         |
| PREX1                                                                       | A0A2X0SFH1       | 16.83563                          | 16.29473                         |
| Probable ATP-dependent RNA helicase DDX6                                    | P26196           | 13.92507                          | 15.68617                         |
| Programmed cell death 11, isoform CRA_a                                     | A0A3B3IUD7       | 16.57407                          | 18.52967                         |
| Prohibitin                                                                  | D6RBK0           | 13.96413                          | 14.79397                         |
| Protein Daple                                                               | Q9P219           | 15.43177                          | 17.67827                         |
| Protein dopey-1                                                             | Q5TA12           | 14.01883                          | 16.26517                         |
| Protein FAM131C                                                             | Q96AQ9           | 12.22923                          | 13.09577                         |

**Table S1.** The relative expression level of 229 distinct proteins found in the scramble of CCA cell lines (cont.)

| Protein Name                                                                   | Accession number | <sup>a</sup> Scramble<br>KKU-213A | <sup>b</sup> Scramble<br>KKU-100 |
|--------------------------------------------------------------------------------|------------------|-----------------------------------|----------------------------------|
| Protein mono-ADP-ribosyltransferase PARP4                                      | Q9UKK3           | 16.54940                          | 15.60237                         |
| PURA protein                                                                   | Q2NLC9           | 17.27140                          | 17.25970                         |
| RAD50-interacting protein 1                                                    | Q6NUQ1           | 14.95506                          | 12.60600                         |
| Ras association (RalGDS/AF-6) and pleckstrin homology domains 1, isoform CRA_b | C9K0J5           | 15.56210                          | 14.15890                         |
| Ras protein-specific guanine nucleotide-releasing factor 1, isoform CRA_b      | Q8IUU5           | 15.53436                          | 17.56273                         |
| Retinal-specific phospholipid-transporting ATPase ABCA4                        | P78363           | 15.82810                          | 16.77223                         |
| Retinitis pigmentosa 1-like 1 protein                                          | Q8IWN7           | 16.67670                          | 14.04800                         |
| Rho guanine nucleotide exchange factor 12                                      | E9PMR6           | 16.54123                          | 15.66653                         |
| Rho guanine nucleotide exchange factor 17                                      | H0YFZ8           | 20.57300                          | 17.17850                         |
| Rhodopsin                                                                      | V9H017           | 17.62013                          | 18.56350                         |
| Ribosomal protein L15                                                          | E7ENU7           | 16.84987                          | 14.67147                         |
| RNA-binding protein 25                                                         | P49756           | 16.56587                          | 17.44307                         |
| Rootletin                                                                      | Q5TZA2           | 18.92520                          | 16.37253                         |
| RRP12-like protein                                                             | Q5JTH9           | 16.64320                          | 14.70807                         |
| SAPS domain family, member 3, isoform CRA_c                                    | A0A024R5F3       | 15.86840                          | 16.32363                         |
| SARDH protein                                                                  | Q05BT1           | 15.34596                          | 14.85590                         |
| Serine/threonine-protein kinase MRCK gamma                                     | Q6DT37           | 16.92260                          | 16.37440                         |
| Serine/threonine-protein kinase ULK4                                           | Q96C45           | 16.22613                          | 14.61367                         |
| SLC12A2 protein                                                                | B7ZM24           | 15.55646                          | 15.77110                         |
| SOGA                                                                           | F2FB34           | 16.84667                          | 17.00327                         |
| Solute carrier 16 (Monocarboxylic acid transporters), member 8, isoform CRA_a  | A0A024R1N8       | 17.47080                          | 17.54893                         |
| SOS1                                                                           | Q53SF8           | 14.81297                          | 14.99180                         |
| Splicing factor, proline- and glutamine-rich                                   | Q2I379           | 13.24550                          | 14.87215                         |
| SPRY domain containing 3, isoform CRA_b                                        | A0A024RAX4       | 19.42803                          | 18.80773                         |
| Sterile alpha motif domain-containing protein 9-like                           | Q8IVG5           | 13.75997                          | 15.12553                         |
| SUMO-specific isopeptidase USPL1                                               | Q5W0Q7           | 15.11830                          | 14.59143                         |
| SWI/SNF complex subunit SMARCC2                                                | F8VXC8           | 14.42036                          | 15.65633                         |
| Taste receptor type 2 member 46                                                | P59540           | 12.54436                          | 16.86867                         |
| T-cell lymphoma invasion and metastasis 2 variant                              | Q59EY7           | 16.10230                          | 16.28703                         |
| Testis tissue sperm-binding protein Li 71n                                     | A0A140VKF4       | 15.39276                          | 13.73707                         |
| Threonine--tRNA ligase 2, cytoplasmic                                          | A2RTX5           | 17.90647                          | 17.04920                         |
| Thrombospondin type-1 domain-containing protein 7A                             | A0A087WY08       | 17.01590                          | 15.40557                         |

**Table S1.** The relative expression level of 229 distinct proteins found in the scramble of CCA cell lines (cont.)

| Protein Name                                                                      | Accession number | <sup>a</sup> Scramble<br>KKU-213A | <sup>b</sup> Scramble<br>KKU-100 |
|-----------------------------------------------------------------------------------|------------------|-----------------------------------|----------------------------------|
| Thyroxine-binding globulin                                                        | P05543           | 16.44707                          | 18.77900                         |
| TNRC4 protein                                                                     | Q9BTF3           | 16.33397                          | 17.22477                         |
| Trans-3-hydroxy-L-proline dehydratase                                             | Q96EM0           | 14.12070                          | 13.77217                         |
| Transmembrane protein 229B                                                        | G3V2T8           | 14.82793                          | 12.89740                         |
| Trichohyalin                                                                      | Q07283           | 16.68580                          | 16.72860                         |
| Trinucleotide repeat containing 15, isoform CRA_a                                 | A0A024R4A5       | 13.84173                          | 14.66457                         |
| TRPC4 protein                                                                     | Q3KR50           | 17.21833                          | 16.11907                         |
| Truncated platelet membrane glycoprotein Ib beta                                  | A0A140GX62       | 13.60433                          | 14.77530                         |
| Truncated RHCE                                                                    | J9ZZ28           | 18.99867                          | 18.10427                         |
| TUBGCP6 protein                                                                   | B2RWN4           | 16.26080                          | 16.56540                         |
| Tubulin tyrosine ligase-like family, member 1, isoform CRA_a                      | A0A024R4U6       | 13.11090                          | 15.70617                         |
| Tumor rejection antigen (Gp96) 1 variant                                          | Q59FC6           | 17.29333                          | 18.52753                         |
| Tyrosine-protein kinase BAZ1B                                                     | Q9UIG0           | 15.19106                          | 17.72040                         |
| U3 small nucleolar RNA-interacting protein 2                                      | O43818           | 16.73207                          | 14.76257                         |
| Uncharacterized protein CAD                                                       | Q53SY7           | 17.11370                          | 13.54680                         |
| Uncharacterized protein DKFZp686A1195                                             | Q6MZU1           | 15.03130                          | 16.42427                         |
| Uncharacterized protein DKFZp686L0869                                             | Q7Z3U5           | 14.45300                          | 17.45910                         |
| Uncharacterized protein DKFZp686L2367                                             | Q63HJ5           | 17.28743                          | 17.08380                         |
| Uncharacterized protein EPAS1                                                     | Q53SM6           | 15.06363                          | 14.10163                         |
| Uncharacterized protein KIAA1841                                                  | Q6NSI8           | 14.40963                          | 15.84723                         |
| Unconventional myosin-Va                                                          | A0A087WY00       | 17.21363                          | 15.56977                         |
| Vacuolar protein sorting-associated protein 13B                                   | Q7Z7G8           | 15.46263                          | 16.61873                         |
| Vacuolar protein sorting-associated protein 13C                                   | Q709C8           | 16.45590                          | 18.08480                         |
| Vitamin D binding protein protein                                                 | Q6LDC6           | 22.42233                          | 20.99427                         |
| von Willebrand factor A domain-containing protein 5B2                             | E9PF42           | 15.77030                          | 16.46133                         |
| YY1AP-related protein1                                                            | A4PB67           | 15.91973                          | 16.14080                         |
| Zinc finger and BTB domain-containing protein 46                                  | Q86UZ6           | 15.81593                          | 14.15240                         |
| Zinc finger and SCAN domain-containing protein 20                                 | P17040           | 18.36460                          | 16.58563                         |
| Zinc finger MYM-type protein 6                                                    | O95789           | 13.46780                          | 16.11133                         |
| Zinc finger protein 268                                                           | F5H467           | 15.31090                          | 16.09290                         |
| Zinc finger protein 40                                                            | F5H212           | 15.72953                          | 16.81953                         |
| Zinc finger protein 42 (Myeloid-specific retinoic acid-responsive), isoform CRA_a | A0A024R4R6       | 17.47743                          | 15.90940                         |

**Table S1.** The relative expression level of 229 distinct proteins found in the scramble of CCA cell lines (cont.)

| Protein Name                    | Accession number | <sup>a</sup> Scramble<br>KKU-213A | <sup>b</sup> Scramble<br>KKU-100 |
|---------------------------------|------------------|-----------------------------------|----------------------------------|
| Zinc finger protein 536         | K7EQN6           | 14.72180                          | 16.48410                         |
| Zinc finger protein 579         | Q8NAF0           | 15.43530                          | 17.13520                         |
| zinc finger protein 726P1       | Q15940           | 14.38427                          | 15.56697                         |
| Zinc finger protein 804A        | B9EGN2           | 15.25293                          | 16.16153                         |
| Zinc finger RNA-binding protein | Q96KR1           | 15.07440                          | 16.33907                         |
| ZMAT1 protein                   | A7MD47           | 16.62973                          | 16.62247                         |

<sup>a</sup>Values represent the log2 fold change of precursor signal intensities in particular scramble KKKU-213A compared to siRNA KKKU-213A detected by LC-MS/MS

<sup>b</sup>Values represent the log2 fold change of precursor signal intensities in particular scramble KKKU-100 compared to siRNA KKKU-100 detected by LC-MS/MS



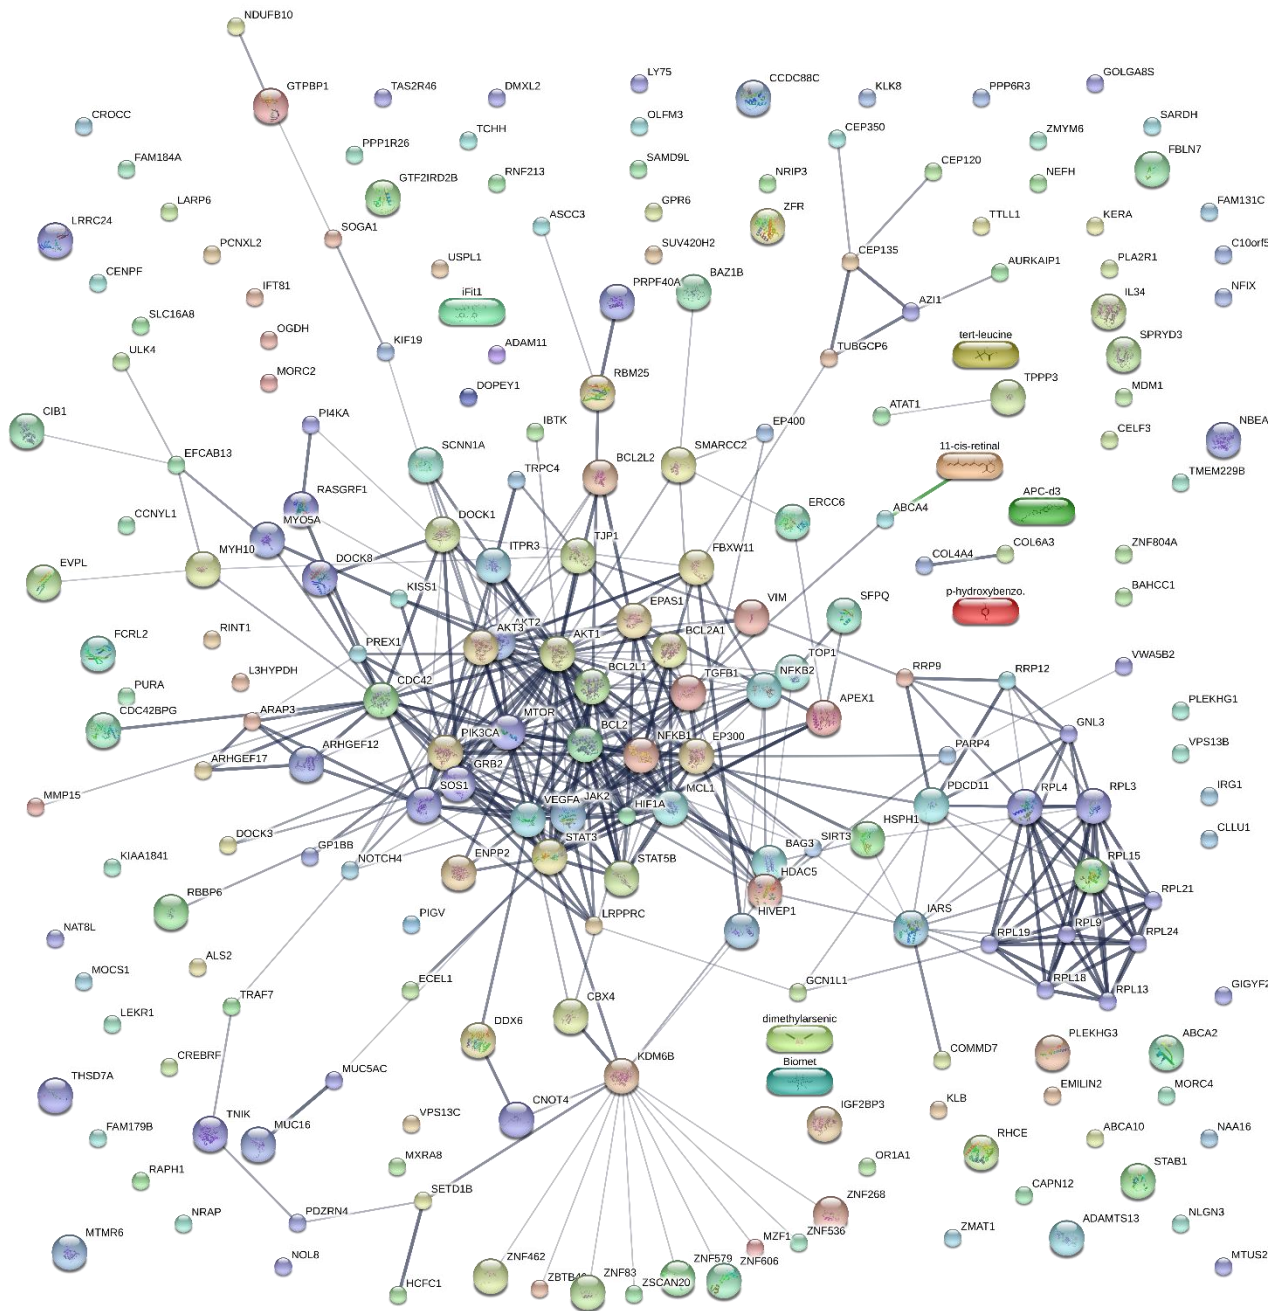

**Figure S1.** Protein interaction networks of APEX1 and the related proteins of scramble CCA cells.
